# Supplementary material for: Determination and characterisation of the surface charge properties of the bacteriophage M13 to assist bio-nanoengineering
Source: Royal Society of Chemistry journal article supplement (doi:10.1039/d0ra04086j), 2020-01-01
Supplement: d0ra04086j1.pdf [file d0ra04086j1.pdf]

## Supplementary Information

### Determination and Characterisation of the Surface Charge Properties of the Bacteriophage M13 to Assist Bio-nanoengineering

*Paolo Passaretti,<sup>a\*</sup> Yiwei Sun,<sup>b</sup> Timothy R. Dafforn<sup>c</sup> and Pola Goldberg Oppenheimer<sup>d</sup>*

<sup>a</sup> Institute of Cancer and Genomic Science, University of Birmingham, Birmingham, B15 2TT, UK

<sup>b</sup> School of Engineering and Materials Science, Queen Mary University of London, London, E1 4NS, UK

<sup>c</sup> School of Biosciences, University of Birmingham, Birmingham, B15 2TT, UK

<sup>d</sup> School of Chemical Engineering, University of Birmingham, Birmingham, B15 2TT, UK

#### Table of Contents

|                      |    |
|----------------------|----|
| 1. Table S1 .....    | 2  |
| 2. Table S2 .....    | 3  |
| 3. Table S3 .....    | 3  |
| 4. Table S4 .....    | 4  |
| 5. Figure S1 .....   | 5  |
| 6. Table S5 .....    | 6  |
| 7. Table S6 .....    | 8  |
| 8. Table S7 .....    | 10 |
| 9. Table S8 .....    | 12 |
| 10. Code S1 .....    | 14 |
| 11. Code S2 .....    | 15 |
| 12. Figure S2 .....  | 16 |
| 13. References ..... | 17 |

**Table S1. Comparison between of M13, *fd* and Pf1**

|                                                | <b>M13</b>                     | <b>Ref.</b> | <b><i>fd</i></b>          | <b>Ref.</b> | <b>Pf1</b>             | <b>Ref.</b> |
|------------------------------------------------|--------------------------------|-------------|---------------------------|-------------|------------------------|-------------|
| <b>Ff filamentous phage class</b>              |                                | I           |                           | I           |                        | II          |
| <b>Genome ID</b>                               | NC_003287.2                    |             | J02451.1                  |             | NC_001331.1            |             |
| <b>Genome type</b>                             | Circular ssDNA                 |             | Circular ssDNA            |             | Circular ssDNA         |             |
| <b>Genome length (bp)</b>                      | 6407                           |             | 6408                      |             | 7349                   |             |
| <b>Percent Identity Matrix – Clustal 2.1</b>   | 100%                           |             | 96.99%                    |             | 50.11%                 |             |
| <b>Virion length (nm)</b>                      | 850-900                        | 1,2         | 760-870                   | 2           | ~ 2000                 | 3           |
| <b>Virion diameter (nm)</b>                    | ~ 6.6                          | 1           | ~ 5.6                     | 2           | ~ 7                    | 3           |
| <b>Number of major coat proteins per phage</b> | 2700                           | 4           | 2700                      | 4           | 7600                   | 4           |
| <b>Coat proteins</b>                           | PIII, PVI, PVII, PVIII and PIX | 2           | III, VI, VII, VIII and IX | 5           | p3, p6, p7, p8 and p9  | 6           |
| <b>Molecular weight (Da)</b>                   | 16.8 × 10 <sup>6</sup>         | 7           | 16.4 × 10 <sup>6</sup>    | 8           | 37.5 × 10 <sup>6</sup> | 4           |

Further information on the differences between M13, *fd* and Pf1 can be found in the literature.<sup>3,4,9–12</sup>

**Table S2. Molecular weight of M13 with calculated values**

|                                                                  | Amino acids<br>(aa) | Base pairs<br>(bp) | Number of<br>copies | MW<br>(Da)   | MW <sub>tot</sub><br>(Da) |
|------------------------------------------------------------------|---------------------|--------------------|---------------------|--------------|---------------------------|
| PIII                                                             | 406                 |                    | 5                   | 42 579.09    | 212 895.45                |
| PVI                                                              | 112                 |                    | 5                   | 12 350.09    | 61 750.45                 |
| PVII                                                             | 33                  | n/a                | 5                   | 3 602.24     | 18 011.20                 |
| PIX                                                              | 32                  |                    | 5                   | 3 653.29     | 18 266.45                 |
| PVIII                                                            | 50                  |                    | 2700                | 5 238.04     | 14 142 708.00             |
| ssDNA                                                            | n/a                 | 6407               | 1                   | 1 976 583.36 | n/a                       |
| <b>Mass of protein capsid: 14 453 631.55 Da</b>                  |                     |                    |                     |              |                           |
| <b>Mass of protein capsid and nucleic acid: 16 430 214.91 Da</b> |                     |                    |                     |              |                           |

The molecular weight (MW) of proteins shown in **Table S2** were calculated using ExPASy Compute pI/Mw tool, available at the following link [https://web.expasy.org/compute\\_pi/](https://web.expasy.org/compute_pi/).<sup>13–15</sup> The MW of the ssDNA (M13 genome sequence available here <https://www.ebi.ac.uk/ena/data/view/V00604&display=fasta>) was calculated using DNA calculator (nucleic acid parameters: DNA; single strand; circular), available at the following link <http://www.molbiotools.com/dnacalculator.html>.

**Table S3. Molecular weight of M13 with measured values**

|                                                               | Amino acids<br>(aa) | Base pairs<br>(bp) | Number of<br>copies | MW<br>(Da)          | MW <sub>tot</sub><br>(Da) | References      |
|---------------------------------------------------------------|---------------------|--------------------|---------------------|---------------------|---------------------------|-----------------|
| PIII                                                          | 406                 |                    | 5                   | 42 675              | 213 375                   |                 |
| PVI                                                           | 112                 |                    | 5                   | 12 264              | 61 320                    |                 |
| PVII                                                          | 33                  | n/a                | 5                   | 3 587               | 17 935                    | <sup>16</sup>   |
| PIX                                                           | 32                  |                    | 5                   | 3 654               | 18 270                    |                 |
| PVIII                                                         | 50                  |                    | 2700                | 5 234               | 14 131 800                |                 |
| ssDNA                                                         | n/a                 | 6407               | 1                   | 2 × 10 <sup>6</sup> | n/a                       | <sup>2,17</sup> |
| <b>Mass of protein capsid: 14 442 700 Da</b>                  |                     |                    |                     |                     |                           |                 |
| <b>Mass of protein capsid and nucleic acid: 16 442 700 Da</b> |                     |                    |                     |                     |                           |                 |

The total mass calculated is in agreement with the value proposed by Beck *et al.* (16.8 × 10<sup>6</sup> ± 0.8 Da)<sup>7</sup> and with the values obtained *via* combining the data in **Table S3**.

**Table S4. M13 surface areas**

| PDB ID: 2MJZ | T                                                                                                                                                                                                                                                      | U    | V    | W    | X    | Y    | Z    | a    | b    | c    | d    | e    | f    | g    | h    | Average (Å <sup>2</sup> ) | Subunits sum (Å <sup>2</sup> ) | M13 areas (nm <sup>2</sup> ) | M13 areas (µm <sup>2</sup> ) |
|--------------|--------------------------------------------------------------------------------------------------------------------------------------------------------------------------------------------------------------------------------------------------------|------|------|------|------|------|------|------|------|------|------|------|------|------|------|---------------------------|--------------------------------|------------------------------|------------------------------|
| Free         | 5381                                                                                                                                                                                                                                                   | 5379 | 5380 | 5378 | 5381 | 5380 | 5379 | 5574 | 5379 | 5380 | 5380 | 5380 | 5382 | 5377 | 5379 | 5393 ± 48                 |                                |                              |                              |
| Assembled    | 5287                                                                                                                                                                                                                                                   | 5285 | 5287 | 5285 | 5287 | 5284 | 5282 | 5283 | 5282 | 5283 | 5286 | 5286 | 5288 | 5283 | 5286 | 5285 ± 2                  | 79,273                         | 14,269,205                   | 0.143                        |
| Core         |                                                                                                                                                                                                                                                        |      |      |      |      |      |      |      |      |      |      |      |      |      |      |                           | 81,193                         | 14,614,726                   | 0.146                        |
| Asbl_ext     | 3051                                                                                                                                                                                                                                                   | 3051 | 3051 | 3050 | 3052 | 3051 | 3052 | 3050 | 3051 | 3051 | 3054 | 3054 | 3054 | 3053 | 3054 | 3052 ± 1                  | 45,777                         | 8,239,940                    | 0.082                        |
| Core_ext     |                                                                                                                                                                                                                                                        |      |      |      |      |      |      |      |      |      |      |      |      |      |      |                           | 46,029                         | 8,285,259                    | 0.083                        |
| Asbl_int     | 2232                                                                                                                                                                                                                                                   | 2231 | 2232 | 2231 | 2231 | 2229 | 2227 | 2229 | 2227 | 2228 | 2229 | 2228 | 2230 | 2226 | 2228 | 2229 ± 2                  | 33,438                         | 6,018,801                    | 0.060                        |
| Core_int     |                                                                                                                                                                                                                                                        |      |      |      |      |      |      |      |      |      |      |      |      |      |      |                           | 33,053                         | 5,949,506                    | 0.059                        |
| Free         | 4636                                                                                                                                                                                                                                                   | 4639 | 4636 | 4636 | 4634 | 4635 | 4634 | 4807 | 4807 | 4634 | 4636 | 4634 | 4634 | 4636 | 4636 | 4658 ± 58                 |                                |                              |                              |
| Assembled    | 1820                                                                                                                                                                                                                                                   | 1820 | 1817 | 1817 | 1818 | 1772 | 1774 | 1775 | 1774 | 1771 | 1811 | 1809 | 1810 | 1811 | 1810 | 1801 ± 20                 | 27,009                         | 4,861,577                    | 0.049                        |
| Core         |                                                                                                                                                                                                                                                        |      |      |      |      |      |      |      |      |      |      |      |      |      |      |                           | 27,021                         | 4,863,846                    | 0.049                        |
| Asbl_ext     | 1337                                                                                                                                                                                                                                                   | 1339 | 1335 | 1336 | 1337 | 1336 | 1337 | 1338 | 1337 | 1334 | 1374 | 1372 | 1373 | 1374 | 1373 | 1349 ± 17                 | 20,233                         | 3,641,851                    | 0.036                        |
| Core_ext     |                                                                                                                                                                                                                                                        |      |      |      |      |      |      |      |      |      |      |      |      |      |      |                           | 20,241                         | 3,643,327                    | 0.036                        |
| Asbl_int     | 483                                                                                                                                                                                                                                                    | 482  | 482  | 482  | 481  | 436  | 437  | 438  | 437  | 436  | 437  | 437  | 437  | 437  | 437  | 452 ± 21                  | 6779                           | 1,220,141                    | 0.012                        |
| Core_int     |                                                                                                                                                                                                                                                        |      |      |      |      |      |      |      |      |      |      |      |      |      |      |                           | 6776                           | 1,219,697                    | 0.012                        |
| Free         | The area of each PVIII protein taken individually, not assembled to form the capsid                                                                                                                                                                    |      |      |      |      |      |      |      |      |      |      |      |      |      |      |                           |                                |                              |                              |
| Assembled    | The area of each PVIII protein assembled to form the capsid, excluding their unexposed portions due to the interactions with the surrounding PVIIIs                                                                                                    |      |      |      |      |      |      |      |      |      |      |      |      |      |      |                           |                                |                              |                              |
| Core         | The area of the capsid portion composed of the 15 chains named T, U, V, W, X, Y, Z, a, b, c, d, e, f, g and h from the PDB file 2MJZ, excluding their unexposed portions                                                                               |      |      |      |      |      |      |      |      |      |      |      |      |      |      |                           |                                |                              |                              |
| Asbl_ext     | The area of each assembled PVIII protein excluding the area of the residues in green (inner portion). This corresponds to the contribution of a single PVIII to the M13 external total surface.<br>AEGDDPAKAAAFNSLQASATEYIGYAWAWVAVGATIGIKLFFKFTSKAS   |      |      |      |      |      |      |      |      |      |      |      |      |      |      |                           |                                |                              |                              |
| Core_ext     | The area of the core excluding the area of the residues in green (inner portion). This corresponds to the contribution of 15 PVIIIs to the M13 external total surface area.<br>AEGDDPAKAAAFNSLQASATEYIGYAWAWVAVGATIGIKLFFKFTSKAS                       |      |      |      |      |      |      |      |      |      |      |      |      |      |      |                           |                                |                              |                              |
| Asbl_int     | The area of each assembled PVIII protein excluding the area of the residues in blue (external portion). This corresponds to the contribution of a single PVIII to the M13 internal total surface.<br>AEGDDPAKAAAFNSLQASATEYIGYAWAWVAVGATIGIKLFFKFTSKAS |      |      |      |      |      |      |      |      |      |      |      |      |      |      |                           |                                |                              |                              |
| Core_int     | The area of the core excluding the area of the residues in blue (external portion). This corresponds to the contribution of 15 PVIIIs to the M13 internal total surface area.<br>AEGDDPAKAAAFNSLQASATEYIGYAWAWVAVGATIGIKLFFKFTSKAS                     |      |      |      |      |      |      |      |      |      |      |      |      |      |      |                           |                                |                              |                              |

The surface area in **Table S4** were calculated with pyMOL selecting individual PVIII chains (free and assembled) and the central 15 chains all together (core). The values were calculated using the molecular and solvent accessible surface parameters, respectively. Note, that the values of subunits sum of Assembled, Asbl\_ext and Asbl\_int correspond to the sum of the chains between T to h, while Core, Core\_ext and Core\_int correspond to the values of the 15 chains taken all together. The M13 areas were calculated as:  $(\text{Subunits sum}/15)*2700$ .

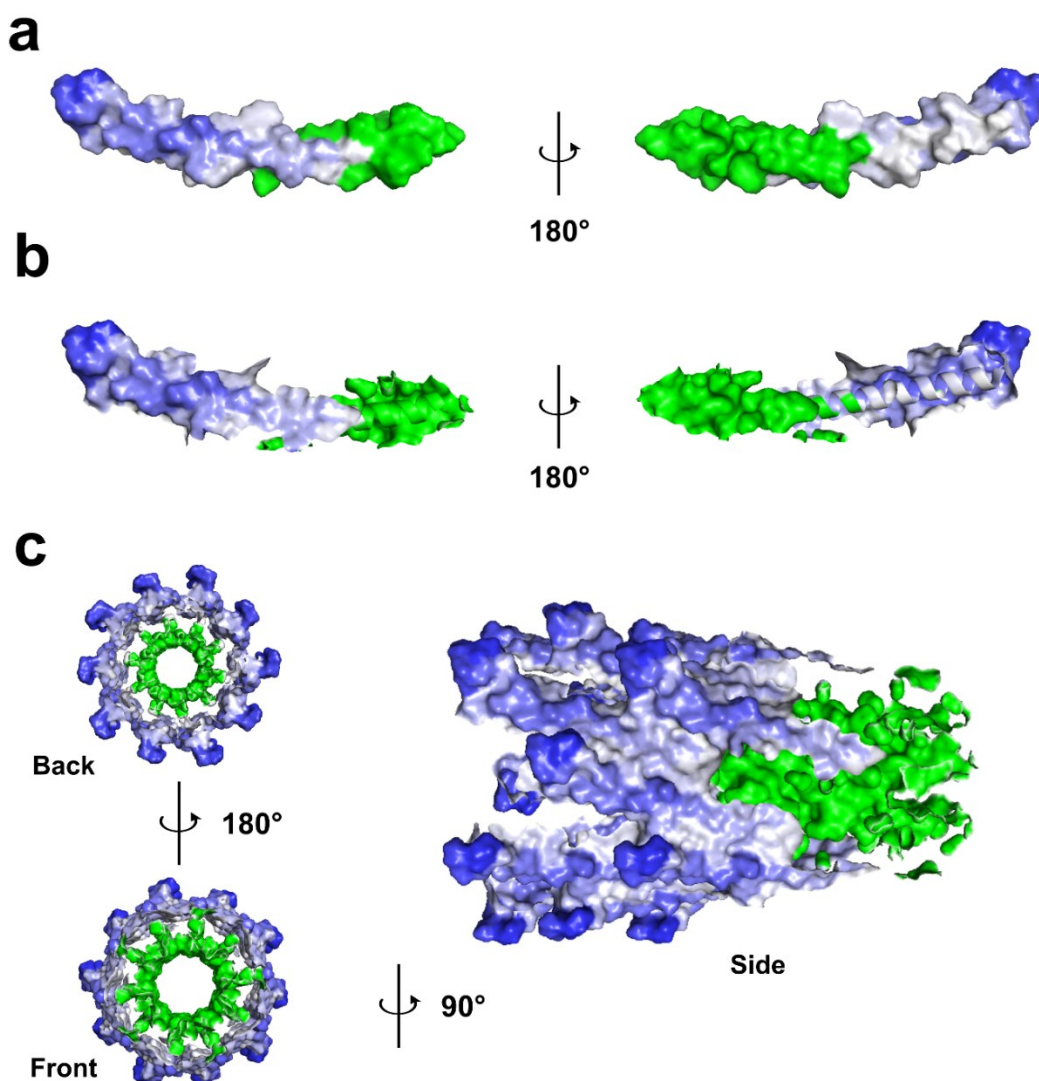

**Figure S1. M13 surface areas**

The surface of PVIII according to Table S4: (a) free, (b) assembled and (c) core.

**Table S5. pKa<sub>1</sub> models**

| Title     | Equation                                  | Y axes: charge – X axes: pH                                                          |
|-----------|-------------------------------------------|--------------------------------------------------------------------------------------|
| <b>A1</b> | $(1 / (10^{(ph - 3.69) + 1})) * (1)$      | 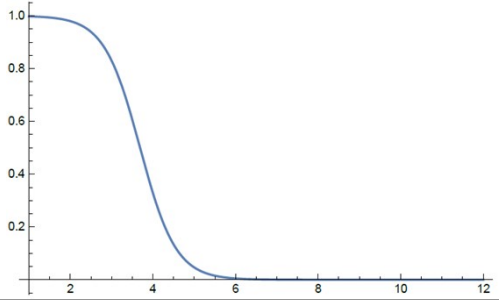   |
| <b>A2</b> | $(1 - 1 / (10^{(ph - 4.25) + 1})) * (-1)$ |    |
| <b>A3</b> | $(1 - 1 / (10^{(ph - 3.65) + 1})) * (-1)$ |   |
| <b>A4</b> | $(1 - 1 / (10^{(ph - 3.65) + 1})) * (-1)$ |  |
| <b>A5</b> | $(1 / (10^{(ph - 10.53) + 1})) * (1)$     |  |

|                  |                                                   |                                                                                      |
|------------------|---------------------------------------------------|--------------------------------------------------------------------------------------|
| <p><b>A6</b></p> | $(1 - 1 / (10^{(ph - 4.25) + 1})) * (-1)$         | 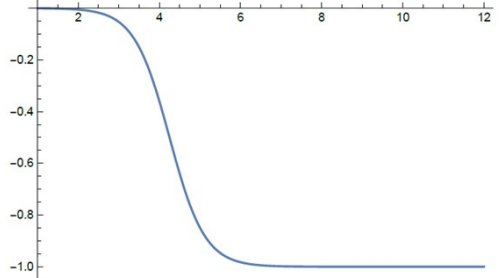   |
| <p><b>A7</b></p> | $(1 - 1 / (10^{(ph - 10.07) + 1})) * (-1)$        |    |
| <p><b>A8</b></p> | $(1 - 1 / (10^{(ph - 10.07) + 1})) * (-1)$        |   |
|                  | $A_{tot} = A1 + A2 + A3 + A4 + A5 + A6 + A7 + A8$ |  |
|                  | $A_{tot} = A1 + A2 + A3 + A4 + A5 + A6$           |  |

**Table S6. pKa<sub>1</sub> + exposure models**

| Title     | Equation                                     | Y axes: charge – X axes: pH                                                          |
|-----------|----------------------------------------------|--------------------------------------------------------------------------------------|
| <b>B1</b> | $(1 / (10^{(ph - 3.69) + 1})) * (1)$         | 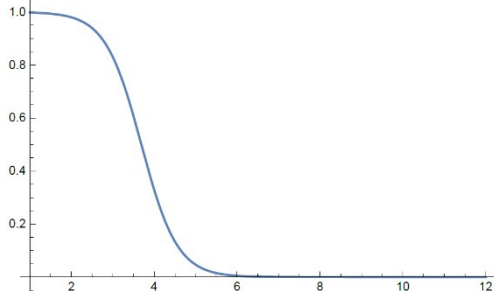   |
| <b>B2</b> | $(1 - 1 / (10^{(ph - 4.25) + 1})) * (-1)$    |    |
| <b>B3</b> | $(1 - 1 / (10^{(ph - 3.65) + 1})) * (-1)$    |   |
| <b>B4</b> | $(1 - 1 / (10^{(ph - 3.65) + 1})) * (-0.58)$ |  |
| <b>B5</b> | $(1 / (10^{(ph - 10.53) + 1})) * (1)$        |  |



|                  |                                                   |                                                                                      |
|------------------|---------------------------------------------------|--------------------------------------------------------------------------------------|
| <p><b>B6</b></p> | $(1 - 1 / (10^{(ph - 4.25) + 1})) * (-0.75)$      | 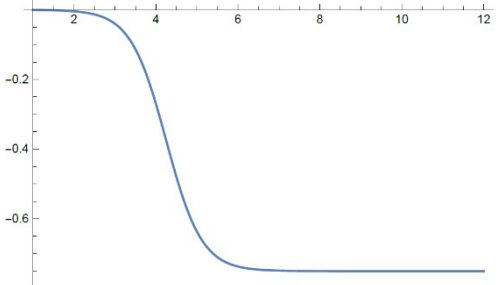   |
| <p><b>B7</b></p> | $(1 - 1 / (10^{(ph - 10.07) + 1})) * (-0.30)$     |    |
| <p><b>B8</b></p> | $(1 - 1 / (10^{(ph - 10.07) + 1})) * (-0.77)$     |   |
|                  | $B_{tot} = B1 + B2 + B3 + B4 + B5 + B6 + B7 + B8$ |  |
|                  | $B_{tot} = B1 + B2 + B3 + B4 + B5 + B6$           |  |

**Table S7. pKa<sub>2</sub> models**

| Title     | Equation                                  | Y axes: charge – X axes: pH |
|-----------|-------------------------------------------|-----------------------------|
| <b>C1</b> | $(1 / (10^{(ph - 8.62) + 1})) * (1)$      |                             |
| <b>C2</b> | $(1 - 1 / (10^{(ph - 3.45) + 1})) * (-1)$ |                             |
| <b>C3</b> | $(1 - 1 / (10^{(ph - 3.11) + 1})) * (-1)$ |                             |
| <b>C4</b> | $(1 - 1 / (10^{(ph - 4.02) + 1})) * (-1)$ |                             |
| <b>C5</b> | $(1 / (10^{(ph - 11.56) + 1})) * (1)$     |                             |

|                  |                                                   |                                                                                      |
|------------------|---------------------------------------------------|--------------------------------------------------------------------------------------|
| <p><b>C6</b></p> | $(1 - 1 / (10^{(ph - 5.21) + 1})) * (-1)$         | 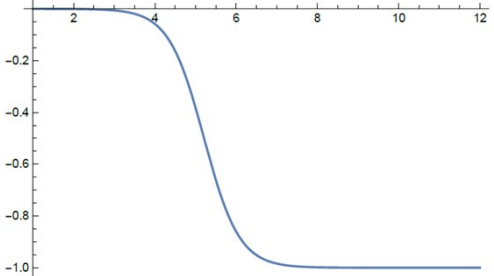   |
| <p><b>C7</b></p> | $(1 - 1 / (10^{(ph - 14.74) + 1})) * (-1)$        |    |
| <p><b>C8</b></p> | $(1 - 1 / (10^{(ph - 13.14) + 1})) * (-1)$        |   |
|                  | $C_{tot} = C1 + C2 + C3 + C4 + C5 + C6 + C7 + C8$ |  |
|                  | $C_{tot} = C1 + C2 + C3 + C4 + C5 + C6$           |  |

**Table S8. pKa<sub>2</sub> + exposure models**

| Title | Equation                                     | Y axes: charge – X axes: pH                                                          |
|-------|----------------------------------------------|--------------------------------------------------------------------------------------|
| D1    | $(1 / (10^{(ph - 8.62) + 1})) * (1)$         | 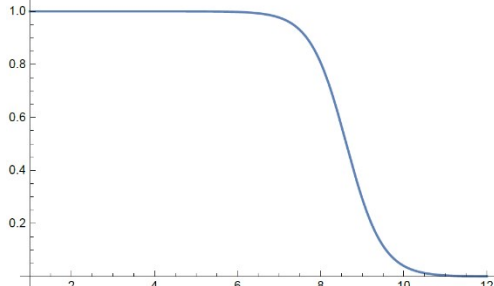   |
| D2    | $(1 - 1 / (10^{(ph - 3.45) + 1})) * (-1)$    |    |
| D3    | $(1 - 1 / (10^{(ph - 3.11) + 1})) * (-1)$    |   |
| D4    | $(1 - 1 / (10^{(ph - 4.02) + 1})) * (-0.58)$ |  |
| D5    | $(1 / (10^{(ph - 11.56) + 1})) * (1)$        |  |

|    |                                                   |                                                                                                                                                                                                                                                                                                                                                                                                            |
|----|---------------------------------------------------|------------------------------------------------------------------------------------------------------------------------------------------------------------------------------------------------------------------------------------------------------------------------------------------------------------------------------------------------------------------------------------------------------------|
| D6 | $(1 - 1 / (10^{(ph - 5.21)} + 1)) * (-0.75)$      | 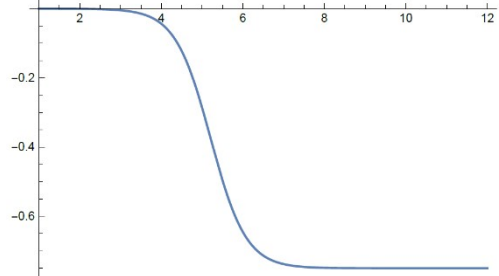 <p>A line graph showing the charge contribution of residue D6 as a function of pH. The x-axis represents pH from 2 to 12, and the y-axis represents charge from -0.6 to 0. The curve starts at 0 for low pH, remains near 0 until approximately pH 4, then drops sharply to a plateau of -0.75 at higher pH values.</p> |
| D7 | $(1 - 1 / (10^{(ph - 14.74)} + 1)) * (-0.30)$     |  <p>A line graph showing the charge contribution of residue D7 as a function of pH. The x-axis represents pH from 2 to 12, and the y-axis represents charge from -0.000015 to 0. The curve remains at 0 until approximately pH 8, then drops sharply to a plateau of -0.30 at higher pH values.</p>                      |
| D8 | $(1 - 1 / (10^{(ph - 13.14)} + 1)) * (-0.77)$     |  <p>A line graph showing the charge contribution of residue D8 as a function of pH. The x-axis represents pH from 2 to 12, and the y-axis represents charge from -0.0008 to 0. The curve remains at 0 until approximately pH 8, then drops sharply to a plateau of -0.77 at higher pH values.</p>                       |
|    | $D_{tot} = D1 + D2 + D3 + D4 + D5 + D6 + D7 + D8$ |  <p>A line graph showing the total charge (D_tot) as a function of pH. The x-axis represents pH from 2 to 12, and the y-axis represents charge from -3 to 2. The curve starts at approximately 2 at low pH, crosses 0 at pH 4, and continues to decrease to approximately -3 at high pH.</p>                           |
|    | $D_{tot} = D1 + D2 + D3 + D4 + D5 + D6$           |  <p>A line graph showing the total charge (D_tot) as a function of pH. The x-axis represents pH from 2 to 12, and the y-axis represents charge from -3 to 2. The curve starts at approximately 2 at low pH, crosses 0 at pH 4, and continues to decrease to approximately -3 at high pH.</p>                           |

Following the code to calculate the charge of the PVIII protein based on the selected amino acids (A1, E2, D4, D5, K8, E20, Y21, Y24). The following code can be used in R to calculate the IEP of modified versions of the PVIII changing some some parameter accordingly (**Code S1**). More information on how to use it are included in the code as well as two examples are listed below (**Code S2 and S3**).

### Code S1. IEP calculator for PVIII protein and other modified versions

```
# Activate the necessary libraries
library(ggplot2)

# Building the X axes which is the pH scale
pH <- seq(1, 12, by=0.001)

# The amino acid listed below are the residues contributing to the total charge
of the M13 wild type
# Adjust the value row:9 column:12 accordingly with the number of residues of
your modified M13
num <- c(1:8)

# Add in brackets the amino acid name and position of your modified M13
name <- c("A1", "E2", "D4", "D5", "K8", "E20", "Y21", "Y24")

# Add the pKa of the corresponding amino acid
pka <- c(8.64, 3.45, 3.11, 4.02, 11.56, 5.21, 14.74, 13.14)

# Add 1 or 0 if the residue is positively or negatively charged
char <- c(1, 0, 0, 0, 1, 0, 0, 0)

# Add the level of exposure to the solvent of the corresponding residue
exp <- c(1, 1, 1, 0.58, 1, 0.75, 0.3, 0.77)

# Create a data frame with all data
PVIII <- data.frame(num, name, pka, char, exp)
PVIII

for(i in num){
  if(PVIII$char[i] == 1){
    assign(sprintf("amino.acid_%d", i), ((1/(10^(pH - PVIII$pka[i]) + 1)) *
(PVIII$exp[i])), envir = .GlobalEnv)
  }
  else {
    assign(sprintf("amino.acid_%d", i), ((1-1/(10^(pH - PVIII$pka[i]) + 1)) * (-
PVIII$exp[i])), envir = .GlobalEnv)
  }
  rm(i)
}

# Once obtained the vectors named "amino.acis_n", if more than 8, add them to the
vector tot (Eg: amino.acid_9 + amino.acid_10)
tot <- amino.acid_1 + amino.acid_2 + amino.acid_3 + amino.acid_4 +
  amino.acid_5 + amino.acid_6 + amino.acid_7 + amino.acid_8

# IEP is the isoelectric point generated from the modified PVIII
IEP <- pH[which.min(abs(tot-0))]
# IEP2 is the closest value to zero of the generated charge values
IEP2 <- tot[which.min(abs(tot-0))]

result <- data.frame(pH, tot, IEP2)
result

plotIEP <- ggplot(result, aes(x=pH, y=tot, lable=pH)) +
  geom_point(size=0.5, shape=1, color="red") +
  geom_text(aes(label=ifelse(tot==IEP2,as.character(pH),'')),hjust=-
0.5,vjust=-1.5) +
  xlab("pH") +
  ylab("Number of charges") +
  theme_light()
plotIEP <- plotIEP + geom_hline(yintercept=0, linetype="solid", color = "black",
size=0.8)
plotIEP <- plotIEP + geom_vline(xintercept=IEP, linetype="solid", color =
"black", size=0.8)
plotIEP
```

## Code S2. IEP calculator used to calculate a modified version of the PVIII

```
# Example: PVIII protein with 3 aspartic and 1 glutamic acids at the N-terminus
in position 2, 3, 4 and 5
pH <- seq(1, 12, by=0.001)
num <- c(1:12)
name <- c("A1", "D2x", "D3x", "D4x", "E5x" "E2", "D4", "D5", "K8", "E20", "Y21",
"Y24")
pka <- c(8.64, 3.11, 3.11, 3.11, 3.45, 3.45, 3.11, 4.02, 11.56, 5.21, 14.74,
13.14)
char <- c(1, 1, 1, 1, 0, 0, 0, 0, 1, 0, 0, 0)
exp <- c(1, 1, 1, 1, 1, 1, 1, 0.58, 1, 0.75, 0.3, 0.77)
PVIII <- data.frame(num, name, pka, char, exp)
PVIII
for(i in num){
  if(PVIII$char[i] == 1){
    assign(sprintf("amino.acid_%d", i), ((1/(10^(pH - PVIII$pka[i]) + 1)) *
(PVIII$exp[i])), envir = .GlobalEnv)
  }
  else {
    assign(sprintf("amino.acid_%d", i), ((1-1/(10^(pH - PVIII$pka[i]) + 1)) * (-
PVIII$exp[i])), envir = .GlobalEnv)
  }
  rm(i)
}
tot <- amino.acid_1 + amino.acid_2 + amino.acid_3 + amino.acid_4 + amino.acid_5 +
amino.acid_6 + amino.acid_7 + amino.acid_8 +
  amino.acid_9 + amino.acid_10 + amino.acid_11 + amino.acid_12
IEP <- pH[which.min(abs(tot-0))]
IEP2 <- tot[which.min(abs(tot-0))]
result <- data.frame(pH, tot, IEP2)
result
plotIEP <- ggplot(result, aes(x=pH, y=tot, lable=pH)) +
  geom_point(size=0.5, shape=1, color="red") +
  geom_text(aes(label=ifelse(tot==IEP2,as.character(pH),''),hjust=-0.5,vjust=-
1.5) +
  xlab("pH") +
  ylab("Number of charges") +
  theme_light()
plotIEP <- plotIEP + geom_hline(yintercept=0, linetype="solid", color = "black",
size=0.8)
plotIEP <- plotIEP + geom_vline(xintercept=IEP, linetype="solid", color =
"black", size=0.8)
plotIEP
```

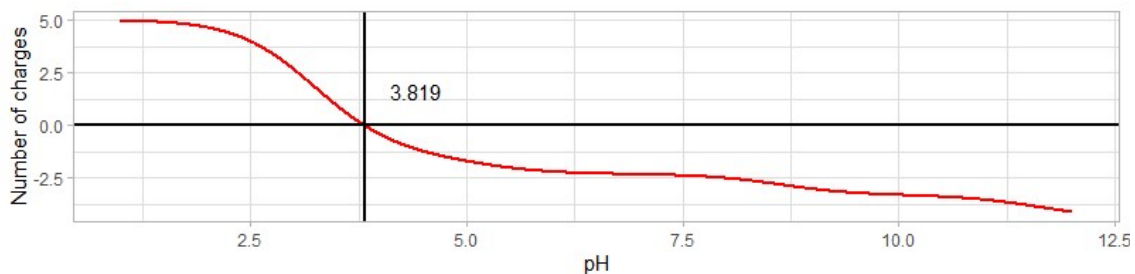

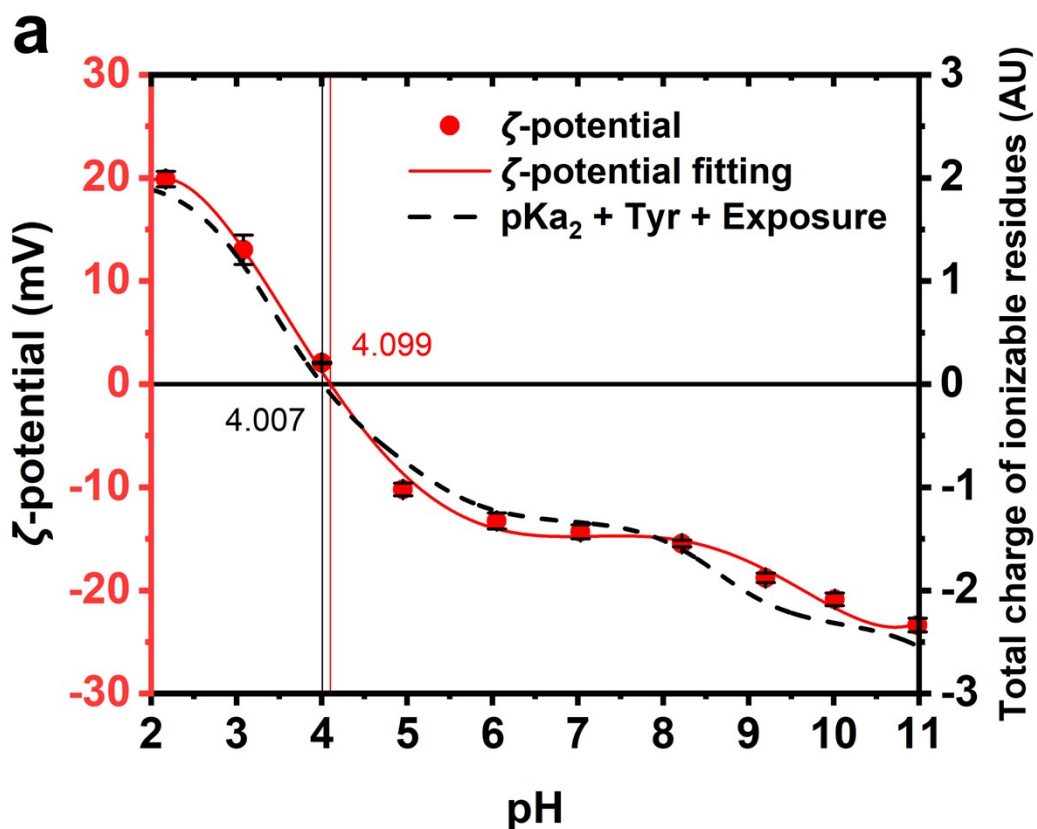

**b**

| Equation                | y = Intercept + B1*x^1 + B2*x^2 + B3*x^3 + B4*x^4 + B5*x^5 |                      |
|-------------------------|------------------------------------------------------------|----------------------|
| Plot                    | z-potential                                                | error                |
| Weight                  | No Weighting                                               |                      |
| Intercept               | -75.82086 ± 30.16783                                       | -4.10503 ± 12.07138  |
| B1                      | 116.81266 ± 30.39556                                       | 5.47588 ± 12.16251   |
| B2                      | -49.08253 ± 11.21275                                       | -2.15651 ± 4.48668   |
| B3                      | 8.55142 ± 1.91684                                          | 0.3817 ± 0.76701     |
| B4                      | -0.67362 ± 0.15362                                         | -0.03129 ± 0.06147   |
| B5                      | 0.01979 ± 0.00466                                          | 9.66421E-4 ± 0.00187 |
| Residual Sum of Squares | 5.38041                                                    | 0.86147              |
| R-Square (COD)          | 0.99726                                                    | 0.2131               |
| Adj. R-Square           | 0.99384                                                    | -0.77053             |

**Figure S2. Determination of the IEP of M13**

(a) The  $\zeta$ -potential values were fitted with a polynomial function of order 5 and compared to the model  $pK_{a2}$  which includes tyrosins and exposure level. The final IEP value was calculated *via* averaging the IEPs from both curves. (b) The parameters of the fitting function.



## References

1. Marvin, D. A. & Hoffmann-Berling, H. Physical and Chemical Properties of Two New Small Bacteriophages. *Nat. Publ. Gr.* **4866**, 517–518 (1963).
2. Marvin, D. A. & Hohn, B. Filamentous Bacterial Viruses. *Bacteriol. Rev.* **33**, 172–209 (1969).
3. Wolkers, W. F., Haris, P. I., Pistorius, A. M. A., Chapman, D. & Hemminga, M. A. FT-IR Spectroscopy of the Major Coat Protein of M13 and Pf1 in the Phage and Reconstituted into Phospholipid Systems. *Biochemistry* **34**, 7825–7833 (1995).
4. Torbet, J. & Maret, G. High-field magnetic birefringence study of the structure of rodlike phages Pf1 and fd in solution. *Biopolymers* **20**, 2657–2669 (1981).
5. Marvin, D. A. Filamentous Phage Structure, Infection and Assembly. *Curr. Opin. Struct. Biol.* **8**, 150–158 (1998).
6. Stubbs, G. & Kendall, A. Helical viruses. *Adv. Exp. Med. Biol.* **726**, 631–658 (2012).
7. Beck, K. & Duenk, R. M. Flexibility of Bacteriophage M13: Comparison of Hydrodynamic Measurements with Electron Microscopy. *J. Struct. Biol.* **105**, 22–27 (1990).
8. Forsheit, A. B. & Ray, D. S. Conformations of the Single-Stranded DNA of Bacteriophage M13. *Proc. Natl. Acad. Sci.* **67**, 1534–1541 (1970).
9. Day, L. A. & Wiseman, R. L. A Comparison of DNA Packaging in the Virions of fd, Xf, and Pf1. *Cold Spring Harb. Monogr. Arch.* **8**, 605–625 (1978).
10. Day, L. A., Casadevall, A., Prescott, B. & Thomas, G. J. Raman Spectroscopy of Mercury(II) Binding to Two Filamentous Viruses: Ff (fd, M13, f1) and Pf1. *Biochemistry* **27**, 706–711 (1988).
11. Casadevall, A. & Day, L. A. DNA Packing in the Filamentous Viruses fd, Xf, Pfl and Pf3. *Nucleic Acids Res.* **10**, 2467–2481 (1982).
12. Hill, D. F., Short, N. J., Perham, R. N. & Petersen, G. B. *DNA Sequence of the Filamentous Bacteriophage Pfl. I. Nol. Biol.* vol. 218 (1991).
13. Bjellqvist, B. *et al.* The Focusing Positions of Polypeptides in Immobilized pH Gradients can be Predicted from their Amino Acid Sequences. *Electrophoresis* (1993) doi:10.1002/elps.11501401163.
14. Bjellqvist, B., Basse, B., Olsen, E. & Celis, J. E. Reference points for comparisons of two-dimensional maps of proteins from different human cell types defined in a pH scale where isoelectric points correlate with polypeptide compositions. *Electrophoresis* **15**, 529–539 (1994).
15. Gasteiger, E. *et al.* *The Proteomics Protocols Handbook - Chapter 52: Protein Identification and Analysis Tools on the ExPASy Server. The Proteomics Protocols Handbook* (2005). doi:10.1385/1592598900.
16. van Wezenbeek, P. M. G. F. G. F., Hulsebos, T. J. M. M. & Schoenmakers, J. G. G. G. Nucleotide Sequence of the Filamentous Bacteriophage M13 DNA Genome: Comparison with Phage fd. *Gene* **11**, 129–148 (1980).
17. Ray, D. S., Bscheider, H. P. & Hofschneider, P. H. Replication of the Single-Stranded DNA of the Male-Specific Bacteriophage M13. Isolation of Intracellular Forms of Phage-Specific DNA. *J. Mol. Biol.* **21**, 473–483 (1966).
